# Supplementary material for: Highly Fluorescent Green Carbon Dots as a Fluorescent Probe for Detecting Mineral Water pH
Source: Sensors (Basel). 2019 Sep 3;19(17):3801. doi: 10.3390/s19173801 (PMC6749429; doi:10.3390/s19173801)
Supplement: Supplementary file 1 [file sensors-19-03801-s001.pdf]

# **Supplementary Information**

## **Highly fluorescent green carbon dots as a fluorescent probe for detecting mineral water pH**

**Tingyu Wang** <sup>1,2</sup>, **Lei Li** <sup>1,2</sup>, **Yamin Wu** <sup>1,2</sup> and **Guoqing Chen** <sup>1,2,\*</sup>

<sup>1</sup> School of science, Jiangnan University, Wuxi, 214122, P. R. China; jncgq@jiangnan.edu.cn

<sup>2</sup> School of Science, Jiangsu Provincial Research Center of Light Industrial Optoelectronic Engineering and Technology, Wuxi, 214122, China;; cq2098@163.com

\* Correspondence: jncgq@jiangnan.edu.cn; Tel.: +86-13906176695

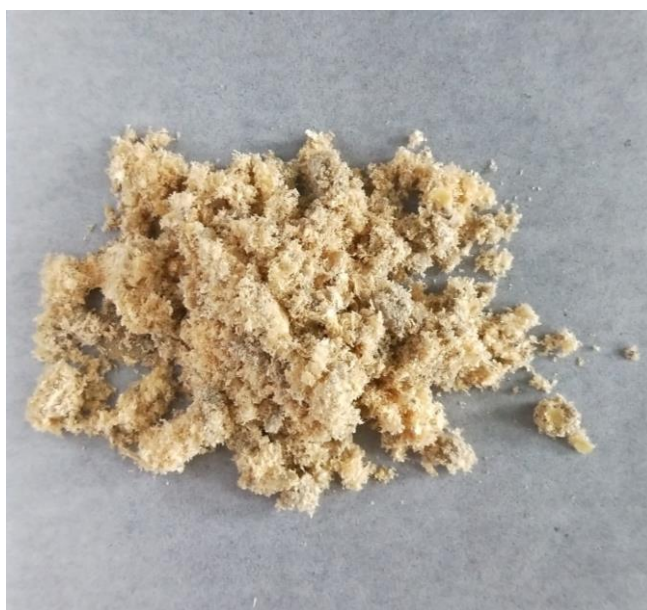

**Figure S1.** The image of the CDs solid powder

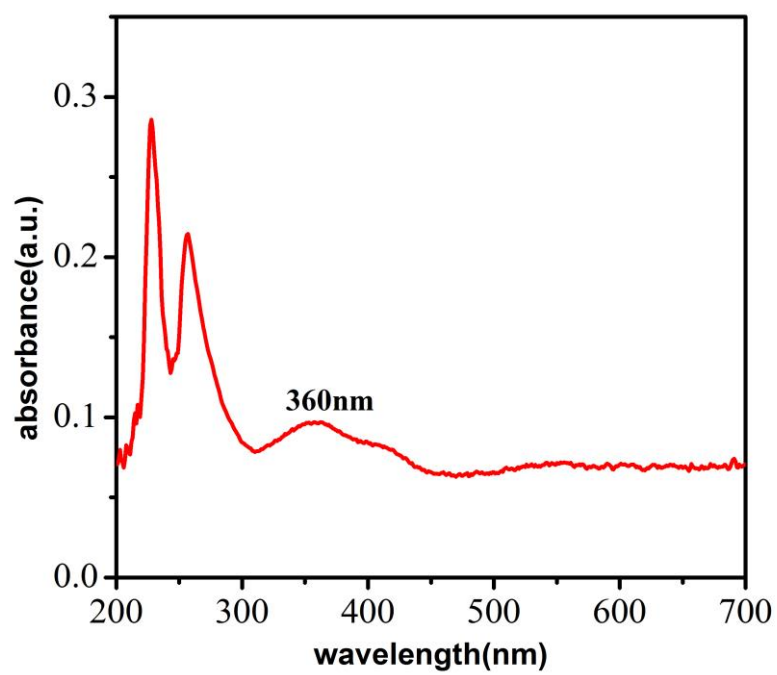

Figure S2. Absorption spectrum of the CDs.

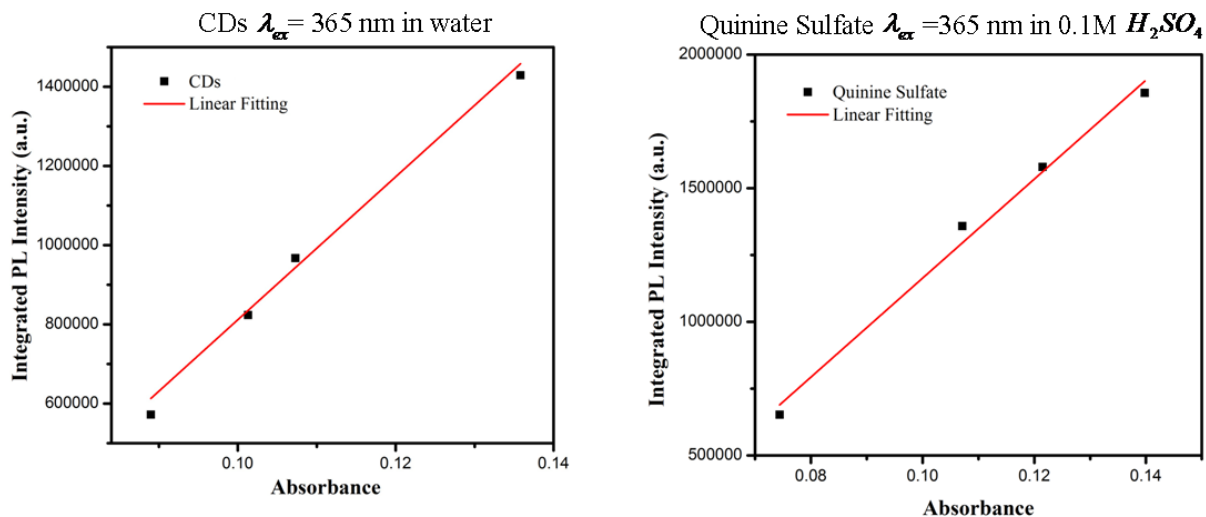

|               | CDs                |        |        |         | Quinine Sulfate    |         |         |         |
|---------------|--------------------|--------|--------|---------|--------------------|---------|---------|---------|
| Absorbance    | 0.089              | 0.1013 | 0.1073 | 0.1358  | 0.0744             | 0.1071  | 0.1215  | 0.1398  |
| Integrated PL | 572100             | 823200 | 966900 | 1429000 | 652300             | 1358000 | 1579000 | 1856000 |
| Slope         | $1.81 \times 10^6$ |        |        |         | $1.85 \times 10^6$ |         |         |         |
| QY            | 53.81%             |        |        |         | 55%                |         |         |         |

**Figure S3.** Plot of integrated PL intensity of the CDs and quinine sulfate (referenced dye) as a function of optical absorbance at 365 nm and relevant data.

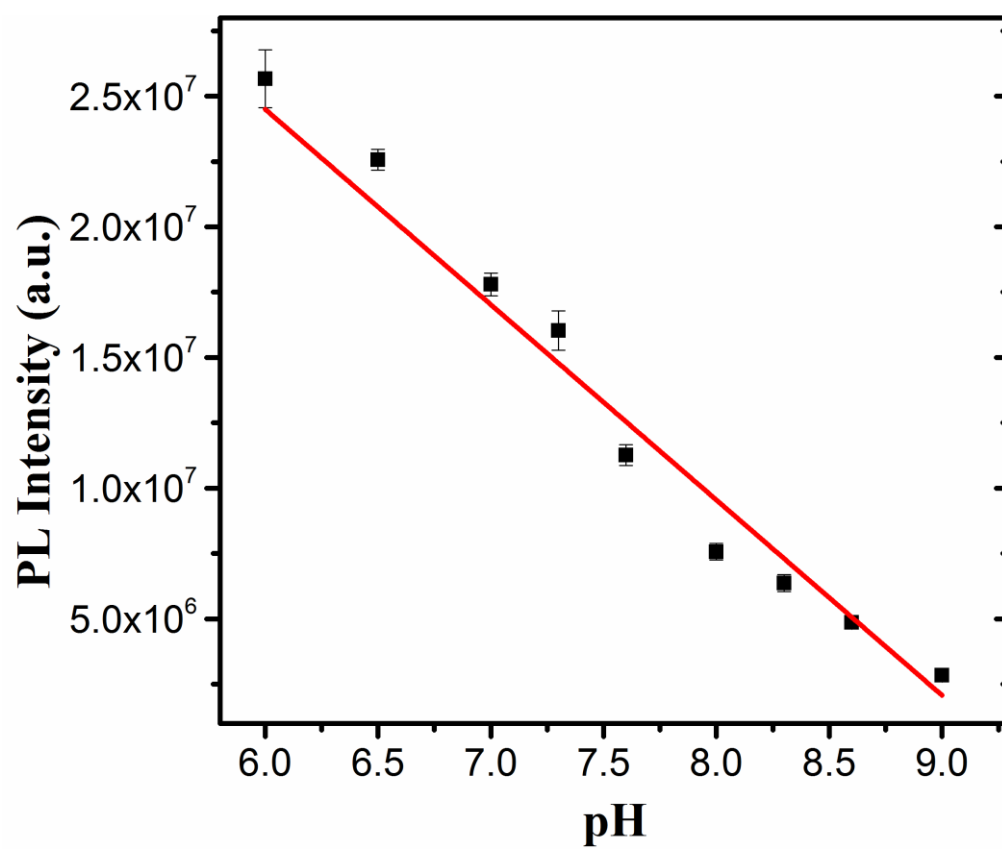

**Figure S4.** A linear relationship between PL intensity and pH (from 6.0 to 9.0).

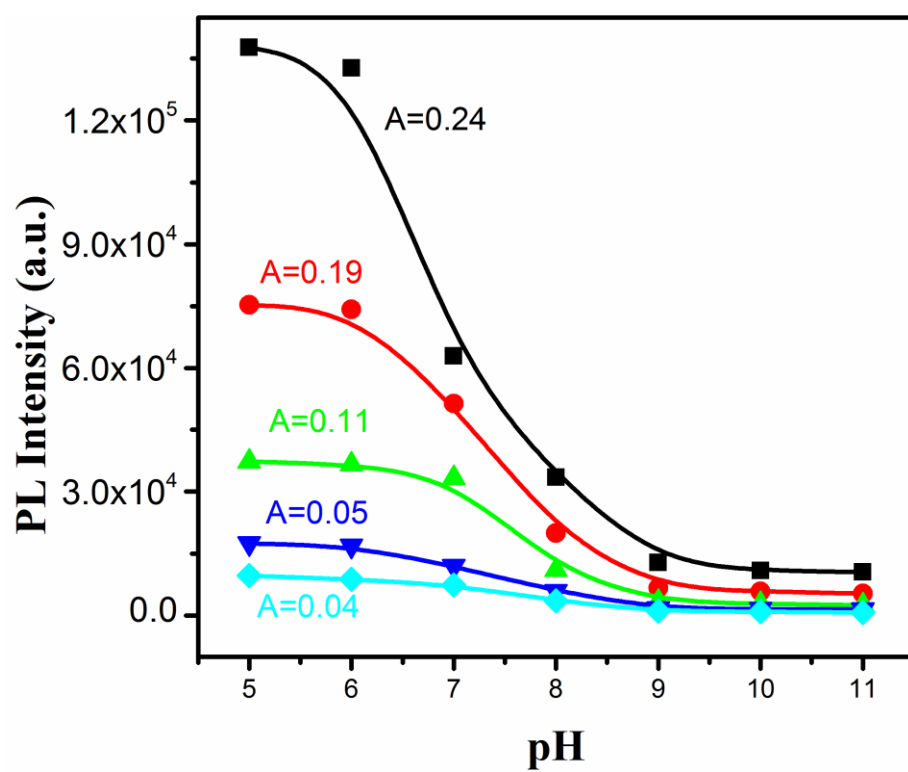

Figure S5. Response of CDs to pH at different absorbances (at 390 nm).

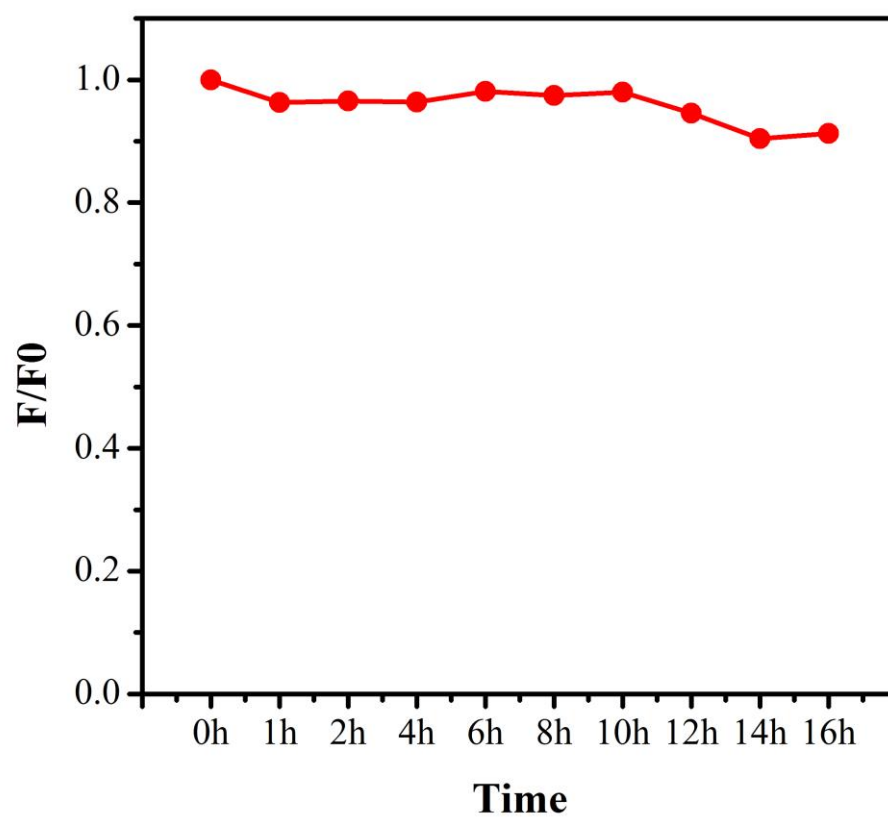

**Figure S6.** Photo stability of CDs under the irradiation of a 600W light at various times.
